# Supplementary material for: Organizational Debut on the Public Stage: Marketing Myopia and Initial Public Offerings
Source: Atypon-hosted journal article supplement (doi:10.1287/mksc.2015.0970), 2016-03-25
Supplement: mksc.2015.0970-SM-Appendix_Revised.pdf [file mksc.2015.0970-SM-Appendix_Revised.pdf]

# Organizational Debut on the Public Stage: Marketing Myopia and Initial Public Offerings

Alok R. Saboo  
Anindita Chakravarty  
Rajdeep Grewal

November 2015

---

Alok R. Saboo is Assistant Professor of Marketing and Assistant Director of the Center for Excellence in Brand & Customer Management, J. Mack Robinson College of Business, Georgia State University, Atlanta, GA, 30303 (email: asaboo@gsu.edu). Anindita Chakravarty is an Assistant Professor in the Department of Marketing, Terry College of Business, University of Georgia, Athens, GA 30602 (e-mail: achakra@uga.edu). Rajdeep Grewal is the Townsend Family Distinguished Professor of Marketing, Kenan-Flagler Business School, University of North Carolina, Chapel Hill NC 27599 (e-mail: grewalr@unc.edu). This article benefitted from comments by Natalie Mizik, Denish Shah, and Guiyang Xiong, as well as the constructive feedback of Senior Editor Russ Winer, the associate editor, and the reviewers.

## **WEB APPENDIX**

### **Table of Contents**

1. Brief review of literature on marketing myopia or IPO/SEO research in Marketing 1

# Organizational Debut on the Public Stage: Marketing Myopia and Initial Public Offerings

**Table A1: Brief review of literature on marketing myopia or IPO/SEO research in Marketing**

| Study                       | Construct Examined                                                                       | Short Term Outcome | Long Term Outcome | DV Used                                                          | Moderators                                              | Endogeneity Correction | Findings                                                                                                                                                                                                                                                                                             |
|-----------------------------|------------------------------------------------------------------------------------------|--------------------|-------------------|------------------------------------------------------------------|---------------------------------------------------------|------------------------|------------------------------------------------------------------------------------------------------------------------------------------------------------------------------------------------------------------------------------------------------------------------------------------------------|
| Roychowdhury 2006           | Reduced Marketing Spending and Increased Price Promotions                                | No                 | No                | Unanticipated discretionary expenses, production, and cash flows | No                                                      | No                     | Finds evidence suggesting price discounts to temporarily increase sales, overproduction to report lower cost of goods sold, and reduction of discretionary expenditures to improve reported margins.                                                                                                 |
| Mizik and Jacobson 2007     | Reduced Marketing (advertising and R&D) Spending in SEO context                          | Yes                | Upto 5 Years      | BHAR                                                             | No                                                      | No                     | Find that a greater proportion of firms than is typical report earnings higher than normal and marketing investments lower than normal during their SEO. Myopic firms are able to temporarily inflate their stock market valuation, but in the long run they have inferior stock market performance. |
| Luo 2008                    | Pre-IPO marketing spending                                                               | Yes                | No                | IPO volume and underpricing                                      | cost reduction efficiency and number of historical IPOs | No                     | Pre-IPO marketing spending reduces IPO underpricing and boosts IPO trading and that these effects are more salient for firms with higher cost reduction efficiency and in markets with a smaller number of historical IPOs.                                                                          |
| Gunny 2010                  | Reduced Marketing (SG&A and R&D) Spending at the time of quarterly earnings announcement | Yes                | Upto 2 Years      | Industry adjusted ROA                                            | No                                                      | No                     | The results indicate myopic management is positively associated with firms just meeting earnings benchmarks. Moreover, he finds that such actions are positively associated with future performance compared to firms that do not use myopic management and miss the earnings benchmarks.            |
| Mizik 2010                  | Reduced Marketing (advertising and R&D) Spending (CONTEXT?)                              | Yes                | Upto 4 Years      | Abnormal Returns                                                 | No                                                      | No                     | Finds the prevalence of marketing myopia and that such actions are not detected by investors in short term. Further, she finds that myopia has a long-term net negative impact on firm value.                                                                                                        |
| Chapman and Steenburgh 2011 | Increased Retail Promotions at                                                           | Yes                | Next quarter      | Weekly Sales                                                     | No                                                      | No                     | Soup manufacturers double the frequency of all marketing promotions at the fiscal yearend and                                                                                                                                                                                                        |

|                             |                                                             |     |                   |                                                    |                                                                                                                                                                                                    |             |                                                                                                                                                                                                                                                                                                                                                      |
|-----------------------------|-------------------------------------------------------------|-----|-------------------|----------------------------------------------------|----------------------------------------------------------------------------------------------------------------------------------------------------------------------------------------------------|-------------|------------------------------------------------------------------------------------------------------------------------------------------------------------------------------------------------------------------------------------------------------------------------------------------------------------------------------------------------------|
|                             | fiscal quarter-end in a retail context (soup manufacturers) |     |                   |                                                    |                                                                                                                                                                                                    |             | when earnings management incentives are stronger. Further, this increase is focused more heavily on less attractive, unsupported price promotions. Further, there is a price to paid - quarterly EPS falls by almost 7.5% in the subsequent reporting period, resulting in a net loss of 2.5% of quarterly EPS to the manufacturer.                  |
| Chakravarty and Grewal 2011 | Reduced Marketing Spending                                  | No  | No                | Unanticipated R&D and marketing budget adjustments | No                                                                                                                                                                                                 | Yes (BVARX) | Find that in the context of high-technology firms few firms exhibit high levels of managerial myopia by simultaneously cutting both R&D and marketing budgets; instead, firms display moderate myopic reactions, in the form of unanticipated decreases in R&D budgets but increased budgets for marketing functions.                                |
| Moorman et al. 2012         | Innovation Ratchet Strategy                                 | Yes | No                | Abnormal returns and yearly sales growth           | No                                                                                                                                                                                                 | No          | Find that public firms use an innovation ratchet strategy—timing the introduction of innovations in order to demonstrate an improvement in the number of introductions over time. While stock markets reward firms in the short term, such actions create delays in product introductions and, in turn, lower sales growth in the year they ratchet. |
| Saboo and Grewal 2013       | Pre-IPO customer and competitor orientation                 | Yes | No                | Initial returns and trading volume                 | Environmental Moderators (institutional complexity, market turbulence, technological turbulence, competitive intensity); IPO-specific moderators (underwriter reputation, venture capital funding) | Yes (LIV)   | Pre-IPO customer and competitor orientations (CCOs) positively influence IPO outcomes. Furthermore, they find moderating influence of both environmental and IPO-specific moderators.                                                                                                                                                                |
| Kurt and Hulland 2013       | Increased Marketing                                         | No  | Upto 2 Years post | Compounded monthly stock                           | Strategic flexibility of                                                                                                                                                                           | No          | Firms adopt more aggressive strategy (increase marketing spending) following an offering.                                                                                                                                                                                                                                                            |

|                  |                               |     |              |                                                         |                                                                         |     |                                                                                                                                                                                                                                                                                                                                                                               |
|------------------|-------------------------------|-----|--------------|---------------------------------------------------------|-------------------------------------------------------------------------|-----|-------------------------------------------------------------------------------------------------------------------------------------------------------------------------------------------------------------------------------------------------------------------------------------------------------------------------------------------------------------------------------|
|                  | Spending following an IPO/SEO |     | IPO/SEO      | returns                                                 | rivals measured using financial leverage                                |     | However, the impact of such spending on firm value is moderated by strategic flexibility such that the stock market reacts favorably to an aggressive marketing strategy initiated by issuers competing against rivals with relatively less flexibility, whereas increased marketing investments do not translate into higher firm value when rivals have greater flexibility |
| Current Research | Reduced marketing Spending    | Yes | Upto 3 Years | Initial returns for short-term and MPBHAR for long term | Key customer relationships, strategic emphasis, and strategic alliances | Yes | Myopic marketing helps short-term IPO outcomes, but hurts firms in the long run. Moreover, the penalty for myopic marketing activities increases with increase in strategic alliances and strategic emphasis on value creation relative to value appropriation and decreases with increase in key customer relationships.                                                     |

## REFERENCES

- Chakravarty, A., R. Grewal. 2011. The Stock Market in the Driver's Seat! Implications for R&D and Marketing. *Manage. Sci.* **57**(9) 1594-1609.
- Chapman, C.J., T.J. Steenburgh. 2011. An Investigation of Earnings Management through Marketing Actions. *Manage. Sci.* **57**(1) 72-92.
- Gunny, K.A. 2010. The Relation between Earnings Management Using Real Activities Manipulation and Future Performance: Evidence from Meeting Earnings Benchmarks. *Contemp. Account. Res.* **27**(3) 855-888.
- Kurt, D., J. Hulland. 2013. Aggressive Marketing Strategy Following Equity Offerings and Firm Value: The Role of Relative Strategic Flexibility. *J. Marketing* **77**(5) 57-74.
- Luo, X. 2008. When Marketing Strategy First Meets Wall Street: Marketing Spendings and Firms' Initial Public Offerings (IPOs). *J. Marketing* **72**(5) 98-109.
- Mizik, N. 2010. The Theory and Practice of Myopic Management. *J. Marketing Res.* **47**(4) 594-611.
- Mizik, N., R. Jacobson. 2007. Myopic Marketing Management: Evidence of the Phenomenon and Its Long-Term Performance Consequences in the SEO Context. *Marketing Sci.* **26**(3) 361-379.
- Moorman, C., S. Wies, N. Mizik, F.J. Spencer. 2012. Firm Innovation and the Ratchet Effect among Consumer Packaged Goods Firms. *Marketing Sci.* **31**(6) 934-951.
- Roychowdhury, S. 2006. Earnings Management through Real Activities Manipulation. *J. Acc. Econ.* **42**(3) 335-370.
- Saboo, A.R., R. Grewal. 2013. Stock Market Reactions to Customer and Competitor Orientations: The Case of Initial Public Offerings. *Marketing Sci.* **32**(1) 70-88.
